# Supplementary material for: Dissection of Common Rust Resistance in Tropical Maize Multiparent Population through GWAS and Linkage Studies
Source: MDPI journal article supplement (doi:10.3390/plants13101410), 2024-05-18
Supplement: s1 [file s1]

**Supplementary Table S1.** QTLs located in three RIL populations.

| BLUP   |          |     |              |                      |                |                |      |                 |                    |
|--------|----------|-----|--------------|----------------------|----------------|----------------|------|-----------------|--------------------|
| Pop    | QTL      | Chr | Position(cM) | Mapping Interval(cM) | left marker    | right marker   | LOD  | Additive_Effect | R <sup>2</sup> (%) |
| CML312 | qRUST3-1 | 3   | 103.72       | 101.71-103.72        | S3_21,766,539  | S3_19,468,979  | 3.92 | -0.59           | 0.1                |
| CML312 | qRUST3-2 | 3   | 106.73       | 105.73-108.28        | S3_18,118,650  | S3_17,098,052  | 3.17 | -0.54           | 0.08               |
| CML312 | qRUST6-1 | 6   | 36.39        | 36.39-38.39          | S6_108,339,246 | S6_99,941,104  | 4.71 | 0.92            | 0.12               |
| D39    | qRUST2-1 | 2   | 28.49        | 25.05-31.32          | S2_125,535,857 | S2_125,535,857 | 4.71 | -0.48           | 0.09               |
| D39    | qRUST3-3 | 3   | 54.96        | 54.41-59.02          | S3_210,543,887 | S3_172,823,884 | 5.39 | 0.7             | 0.11               |
| Y32    | qRUST4-1 | 4   | 40.43        | 40.12-43.27          | S4_128,564,645 | S4_121,288,117 | 3.37 | 0.46            | 0.08               |
| Y32    | qRUST4-2 | 4   | 52.39        | 51.39-53.39          | S4_94,866,787  | S4_94,866,787  | 3.1  | 0.45            | 0.08               |

**21JH**

|        |          |   |       |             |                |                |      |      |      |
|--------|----------|---|-------|-------------|----------------|----------------|------|------|------|
| CML312 | qRUST6-2 | 6 | 36.73 | 36.39-38.39 | S6_110,692,870 | S6_99,941,104  | 5.21 | 1.08 | 0.13 |
| D39    | qRUST3-4 | 3 | 54.96 | 54.41-59.59 | S3_210,543,887 | S3_172,823,884 | 6.62 | 0.8  | 0.13 |
| D39    | qRUST3-5 | 3 | 96.21 | 96.21-96.21 | S3_212,366,601 | S3_212,366,601 | 3.1  | -0.4 | 0.06 |

### 21YS

|        |          |   |        |               |                |                |      |       |      |
|--------|----------|---|--------|---------------|----------------|----------------|------|-------|------|
| CML312 | qRUST1-1 | 1 | 58.36  | 58.36-58.36   | S1_81,924,769  | S1_81,924,769  | 3.24 | 0.64  | 0.08 |
| CML312 | qRUST1-2 | 1 | 65.58  | 64.58-65.59   | S1_87,398,960  | S1_87,398,960  | 3.04 | 0.62  | 0.07 |
| CML312 | qRUST3-6 | 2 | 117.03 | 117.03-117.03 | S2_14,177,571  | S2_14,177,571  | 3.1  | -0.83 | 0.08 |
| D39    | qRUST2-2 | 2 | 28.49  | 28.49-29.32   | S2_125,535,857 | S2_125,535,857 | 3.26 | -0.48 | 0.07 |
| D39    | qRUST3-7 | 3 | 55.51  | 54.41-56.51   | S3_210,543,887 | S3_172,823,884 | 3.62 | 0.68  | 0.07 |
| Y32    | qRUST4-3 | 4 | 54.83  | 51.39-55.45   | S4_94,866,787  | S4_63,985,272  | 3.56 | 0.59  | 0.08 |
| Y32    | qRUST4-4 | 4 | 58.92  | 57.39-63.39   | S4_57,388,250  | S4_28,135,211  | 4.77 | 0.68  | 0.11 |

### 22YS

|        |          |   |       |             |                |                |      |       |      |
|--------|----------|---|-------|-------------|----------------|----------------|------|-------|------|
| CML312 | qRUST8-1 | 8 | 24.93 | 24.93-24.93 | S8_91,109,417  | S8_91,109,417  | 3.07 | 0.82  | 0.07 |
| D39    | qRUST2-3 | 2 | 28.49 | 25.17-32.32 | S2_125,535,857 | S2_125,535,857 | 4.94 | -0.61 | 0.1  |
| Y32    | qRUST4-2 | 4 | 53.39 | 51.39-53.39 | S4_94,866,787  | S4_94,866,787  | 3.4  | 0.49  | 0.08 |

**Supplementary Table S2.** Common rust significant SNP set.

| Environment | SNP           | Chr | POS       | REF | ALT | MAF      |
|-------------|---------------|-----|-----------|-----|-----|----------|
| BLUP        | snp-54614501  | 2   | 54614501  | A   | G   | 0.094311 |
| BLUP        | snp-164385099 | 2   | 164385099 | A   | G   | 0.396254 |
| BLUP        | snp-203116317 | 3   | 203116317 | A   | G   | 0.162442 |
| BLUP        | snp-203116453 | 3   | 203116453 | T   | C   | 0.160959 |
| BLUP        | snp-204202469 | 3   | 204202469 | A   | G   | 0.163934 |
| BLUP        | snp-224639688 | 3   | 224639688 | T   | G   | 0.163102 |
| BLUP        | snp-122025827 | 4   | 122025827 | T   | C   | 0.082589 |
| BLUP        | snp-122025836 | 4   | 122025836 | C   | T   | 0.082222 |
| BLUP        | snp-122025839 | 4   | 122025839 | A   | C   | 0.082405 |
| BLUP        | snp-122025849 | 4   | 122025849 | T   | A   | 0.083146 |
| BLUP        | snp-118608561 | 5   | 118608561 | T   | C   | 0.411557 |
| BLUP        | snp-118608571 | 5   | 118608571 | C   | A   | 0.410165 |
| BLUP        | snp-118608579 | 5   | 118608579 | G   | C   | 0.411557 |
| BLUP        | snp-76107442  | 6   | 76107442  | C   | T   | 0.155136 |
| BLUP        | snp-76107445  | 6   | 76107445  | G   | T   | 0.154812 |
| BLUP        | snp-118876904 | 8   | 118876904 | G   | C   | 0.14405  |
| BLUP        | snp-102507767 | 10  | 102507767 | G   | T   | 0.16557  |

|      |               |    |           |   |   |          |
|------|---------------|----|-----------|---|---|----------|
| 21JH | snp-54614501  | 2  | 54614501  | A | G | 0.094311 |
| 21JH | snp-200524370 | 2  | 200524370 | T | C | 0.181472 |
| 21JH | snp-104441686 | 3  | 104441686 | C | T | 0.065903 |
| 21JH | snp-203116453 | 3  | 203116453 | T | C | 0.160959 |
| 21JH | snp-204202469 | 3  | 204202469 | A | G | 0.163934 |
| 21JH | snp-221066619 | 3  | 221066619 | G | A | 0.165533 |
| 21JH | snp-224639688 | 3  | 224639688 | T | G | 0.163102 |
| 21JH | snp-118608561 | 5  | 118608561 | T | C | 0.411557 |
| 21JH | snp-118608571 | 5  | 118608571 | C | A | 0.410165 |
| 21JH | snp-118608579 | 5  | 118608579 | G | C | 0.411557 |
| 21JH | snp-55178561  | 6  | 55178561  | G | A | 0.075163 |
| 21JH | snp-55178563  | 6  | 55178563  | C | G | 0.075163 |
| 21JH | snp-76107442  | 6  | 76107442  | C | T | 0.155136 |
| 21JH | snp-76107445  | 6  | 76107445  | G | T | 0.154812 |
| 21JH | snp-61591553  | 7  | 61591553  | C | G | 0.477564 |
| 21JH | snp-118876904 | 8  | 118876904 | G | C | 0.14405  |
| 21JH | snp-102507767 | 10 | 102507767 | G | T | 0.16557  |
| 21YS | snp-54614501  | 2  | 54614501  | A | G | 0.094311 |
| 21YS | snp-164385099 | 2  | 164385099 | A | G | 0.396254 |
| 21YS | snp-212692082 | 5  | 212692082 | C | T | 0.173697 |
| 21YS | snp-53643137  | 7  | 53643137  | C | T | 0.109756 |
| 21YS | snp-118876904 | 8  | 118876904 | G | C | 0.14405  |
| 21YS | snp-102507767 | 10 | 102507767 | G | T | 0.16557  |
| 22YS | snp-54614501  | 2  | 54614501  | A | G | 0.094311 |
| 22YS | snp-206814920 | 2  | 206814920 | A | C | 0.116176 |

|      |               |   |           |   |   |          |
|------|---------------|---|-----------|---|---|----------|
| 22YS | snp-206814979 | 2 | 206814979 | G | A | 0.116279 |
| 22YS | snp-206815067 | 2 | 206815067 | G | A | 0.104816 |
| 22YS | snp-203116317 | 3 | 203116317 | A | G | 0.162442 |
| 22YS | snp-203116453 | 3 | 203116453 | T | C | 0.160959 |
| 22YS | snp-203116471 | 3 | 203116471 | C | T | 0.159453 |
| 22YS | snp-204202469 | 3 | 204202469 | A | G | 0.163934 |
| 22YS | snp-220956352 | 3 | 220956352 | C | T | 0.166065 |
| 22YS | snp-221066619 | 3 | 221066619 | G | A | 0.165533 |
| 22YS | snp-224029612 | 3 | 224029612 | C | T | 0.442623 |
| 22YS | snp-224029629 | 3 | 224029629 | T | C | 0.468927 |
| 22YS | snp-224029717 | 3 | 224029717 | G | A | 0.433333 |
| 22YS | snp-224639688 | 3 | 224639688 | T | G | 0.163102 |
| 22YS | snp-122025816 | 4 | 122025816 | T | A | 0.084283 |
| 22YS | snp-122025827 | 4 | 122025827 | T | C | 0.082589 |
| 22YS | snp-122025836 | 4 | 122025836 | C | T | 0.082222 |
| 22YS | snp-122025839 | 4 | 122025839 | A | C | 0.082405 |
| 22YS | snp-122025850 | 4 | 122025850 | A | T | 0.082589 |
| 22YS | snp-54530619  | 5 | 54530619  | T | C | 0.019774 |
| 22YS | snp-118608571 | 5 | 118608571 | C | A | 0.410165 |
| 22YS | snp-74247937  | 6 | 74247937  | A | T | 0.3775   |
